# Supplementary material for: Teaching Membrane Transport Concepts Using Flipped Teaching & Dramatizations
Source: Oxford University Press journal article supplement (doi:10.1525/abt.2021.83.5.337), 2021-05-01
Supplement: abt8305_08_t3_halpin_supplemental_material_appendix_s1.docx [file abt8305_08_t3_halpin_supplemental_material_appendix_s1.docx]

**Appendix S1**

**Membrane Transport Pretest**

I am confident in my knowledge of the different types of membrane transport.

1. Not confident

2. Somewhat confident

3. Confident

4. Very confident

5. Extremely confident

1. Molecules that move passively through the membrane down their concentration gradient use the process of _______________.

a. pinocytosis

b. active transport

c. simple diffusion

d. antiport

2. Osmosis is the ______.

1. when the smell of the neighbors trash moves through the neighborhood
2. smell of cookies moving through the kitchen
3. movement of water down its gradient across a semi-permeable membrane
4. movement of water against its gradient across a semi-permeable membrane

3. What is another term for “selectively permeable”?

1. porous
2. completely permeable
3. permanent
4. semipermeable

4. What is the difference between active and passive transport?

1. Active does not need energy and passive uses ATP (energy)
2. Active uses ATP (energy) and passive does not need energy
3. Active stores transport proteins and passive releases
4. Active uses hormones and passive does not

5. The Na+–K+ Pump moves _________ and __________ every cycle.

a. 1 Na+ in, 1 K+ in

b. 1 K+ out, 2 Na+ out

c. 3 Na+ out, 2 K+ in

d. 3 K+ out, 2 Na+ in

6. Facilitated Diffusion moves substrates _________________.

a. against its concentration gradient through the membrane.

b. against is concentration gradient via ferry boat proteins.

c. no gradient needed to pass through the membrane.

d. down its concentration gradient via ferry boat proteins

7. Oxygen is transported from the __________ to the ____________ via__________.

a. capillary, alveolus, diffusion

b. alveolus, capillary, osmosis

c. capillary, alveolus, osmosis

d. alveolus, capillary, diffusion

8. Carbon dioxide is transported from the __________ to the ____________ via__________.

a. capillary, alveolus, diffusion

b. alveolus, capillary, osmosis

c. capillary, alveolus, osmosis

d. alveolus, capillary, diffusion

9. In an isotonic solution there would be:

a. no net movement of water

b. net movement of water into the cell

c. net movement of water out of the cell

d. bursting of the cell

10. When a cell bursts due to osmosis, it is in a solution that is:

a. hypertonic

b. isotonic

c. hypotonic

d. either A or C

**Membrane Transport Posttest**

I am confident in my knowledge of the different types of membrane transport.

1. Not confident

2. Somewhat confident

3. Confident

4. Very confident

5. Extremely confident

1. Molecules that move passively through the membrane down their concentration gradient use the process of _______________.

a. pinocytosis

b. active transport

c. simple diffusion

d. antiport

2. Osmosis is the ______

a. when the smell of the neighbors trash moves through the neighborhood

b. smell of cookies moving through the kitchen

c. movement of water down its gradient across a semi-permeable membrane

d. movement of water against its gradient across a semi-permeable membrane

3. What is another term for “selectively permeable”?

a. porous

b. completely permeable

c. permanent

d. semipermeable

4. What is the difference between active and passive transport?

a. Active does not need energy and passive uses ATP (energy)

b. Active uses ATP (energy) and passive does not need energy

c. Active stores transport proteins and passive releases

d. Active uses hormones and passive does not

5. The Na+–K+ Pump moves _________ and __________ every cycle.

a. 1 Na+ in, 1 K+ in

b. 1 K+ out, 2 Na+ out

c. 3 Na+ out, 2 K+ in

d. 3 K+ out, 2 Na+ in

6. Facilitated Diffusion moves substrates _________________.

a. against its concentration gradient through the membrane.

b. against is concentration gradient via ferry boat proteins.

c. no gradient needed to pass through the membrane

d. down its concentration gradient via ferry boat proteins

7. Oxygen is transported from the __________ to the ____________ via__________.

a. capillary, alveolus, diffusion

b. alveolus, capillary, osmosis

c. capillary, alveolus, osmosis

d. alveolus, capillary, diffusion

8. Carbon dioxide is transported from the __________ to the ____________ via__________.

a. capillary, alveolus, diffusion

b. alveolus, capillary, osmosis

c. capillary, alveolus, osmosis

d. alveolus, capillary, diffusion

9. In an isotonic solution there would be:

a. no net movement of water

b. net movement of water into the cell

c. net movement of water out of the cell

d. bursting of the cell

10. When a cell bursts due to osmosis, it is in a solution that is:

a. hypertonic

b. isotonic

c. hypotonic

d. either A or C

11. Did performing the activities in class help you learn the material?

a. Yes

b. No

12. If you answered yes to question 11 explain.
